# Supplementary material for: Catalytic behaviors of combined oxides derived from Mg/AlxFe1−x–Cl layered double hydroxides for H2S selective oxidation
Source: Royal Society of Chemistry journal article supplement (doi:10.1039/c5cy00689a), 2015-01-01
Supplement: c5cy00689a1.pdf [file c5cy00689a1.pdf]

## Supplementary material

# Catalytic Behaviors of Combined Oxides Derived from Mg/Al<sub>x</sub>Fe<sub>1-x</sub>-Cl Layered Double Hydroxides for H<sub>2</sub>S Selective Oxidation

Xin Zhang<sup>1</sup>, Zhuo Wang<sup>1,2</sup>, Yuyin Tang<sup>1,3</sup>, Nanli Qiao<sup>1</sup>, Yang Li<sup>1</sup>, Siqu Qu<sup>4</sup>,  
Zhengping Hao<sup>1\*</sup>

<sup>1</sup>*Department of Environmental Nano-materials, Research Center for Eco-Environmental  
Sciences, Chinese Academy of Sciences, Beijing 100085, P. R. China*

<sup>2</sup>*Department of Chemistry, Tsinghua University, Beijing, 100084, P.R. China.*

<sup>3</sup>*School of Chemistry and Chemical Engineering, Shaanxi Normal University, Xi'an, 710119, P. R.  
China*

<sup>4</sup>*Center of Research & Development, Shandong Sunway Petrochemical Engineering Share  
Co., Ltd, Beijing 100015, P. R. China*

This Supporting Information includes:

Table S1

Table S1 XPS analysis of prepared catalysts

| Sample                                                        | Mg (At %) | Cl (At%) | Na (At%) | Al (At %) | Fe (At %) | S (At %) | Fe/(Al+Fe) (molar ratio) |
|---------------------------------------------------------------|-----------|----------|----------|-----------|-----------|----------|--------------------------|
| Mg <sub>2</sub> Al <sub>0.8</sub> Fe <sub>0.2</sub> O         | 16.4      | 0.5      | 0.9      | 9.6       | 1.2       | -        | 0.1                      |
| Mg <sub>2</sub> Al <sub>0.6</sub> Fe <sub>0.4</sub> O         | 15.6      | 0.4      | 1.3      | 8.8       | 2.3       | -        | 0.2                      |
| Mg <sub>2</sub> Al <sub>0.4</sub> Fe <sub>0.6</sub> O         | 15.8      | 0.5      | 4.5      | 5.7       | 2.9       | -        | 0.3                      |
| Mg <sub>2</sub> Al <sub>0.2</sub> Fe <sub>0.8</sub> O         | 16.9      | 0.2      | 0.5      | 4.1       | 8.3       | -        | 0.7                      |
| Used<br>Mg <sub>2</sub> Al <sub>0.6</sub> Fe <sub>0.4</sub> O | 16.2      | 0.1      | 0.8      | 8.1       | 1.9       | 4.9      | 0.2                      |

Figures S1-S9.

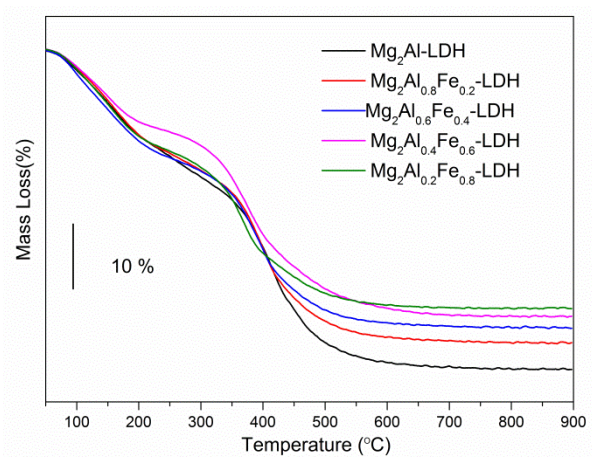

Fig. S1 TG patterns of Mg<sub>2</sub>Al<sub>x</sub>Fe<sub>1-x</sub>-LDH

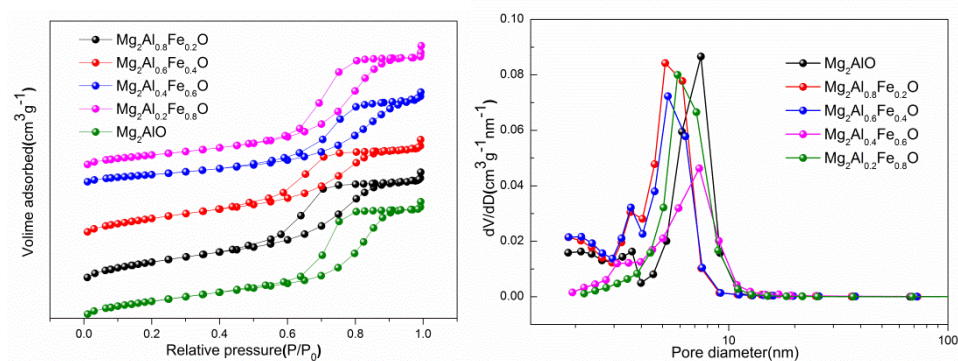

Fig. S2 Nitrogen adsorption/desorption isotherms and pore size distribution calculated from the desorption branch of Mg<sub>2</sub>Al<sub>x</sub>Fe<sub>1-x</sub>O catalysts

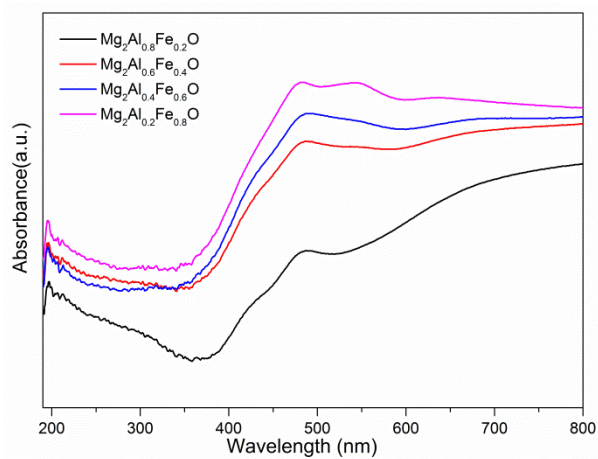

Fig. S3 Uv-vis-DRS patterns of  $Mg_2Al_xFe_{1-x}O$  catalysts

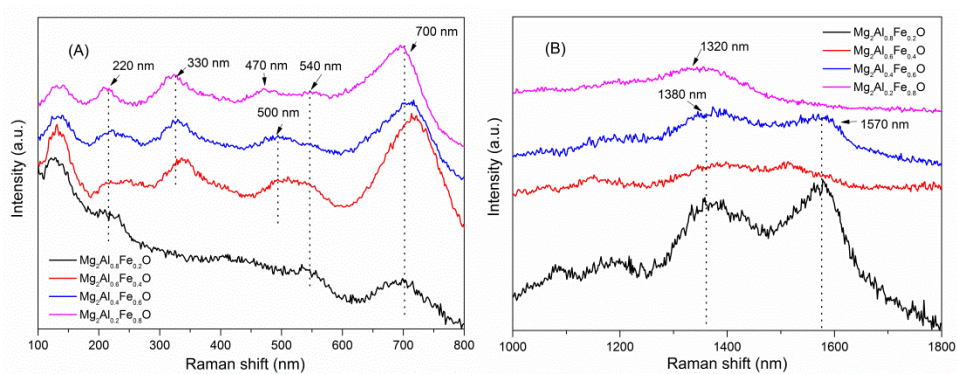

Fig. S4 Raman patterns of  $Mg_2Al_xFe_{1-x}O$  catalysts

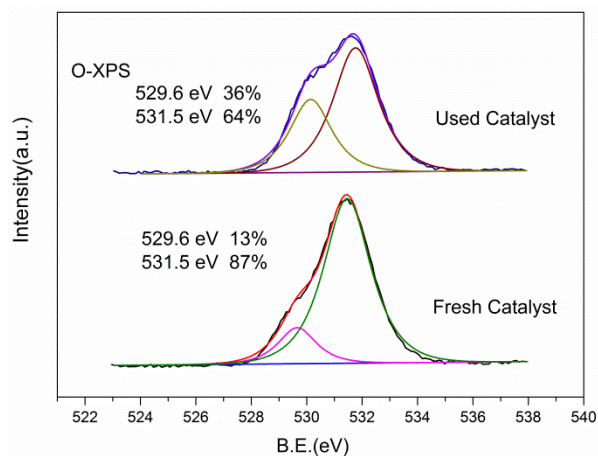

Fig. S5 O-XPS patterns of  $\text{Mg}_2\text{Al}_{0.6}\text{Fe}_{0.4}\text{O}$  catalysts

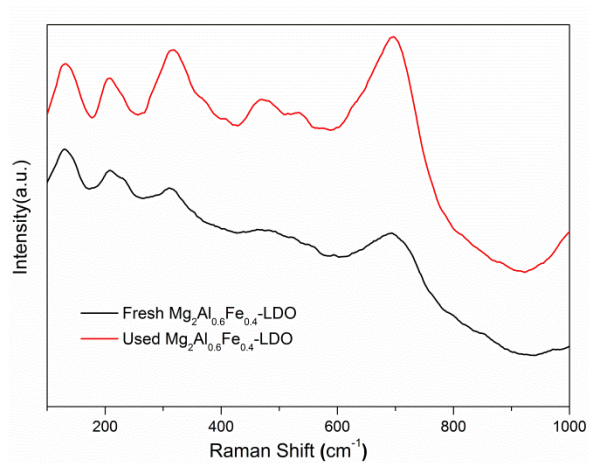

Fig.S6 Raman patterns of fresh and used  $\text{Mg}_2\text{Al}_{0.6}\text{Fe}_{0.4}\text{O}$  catalyst

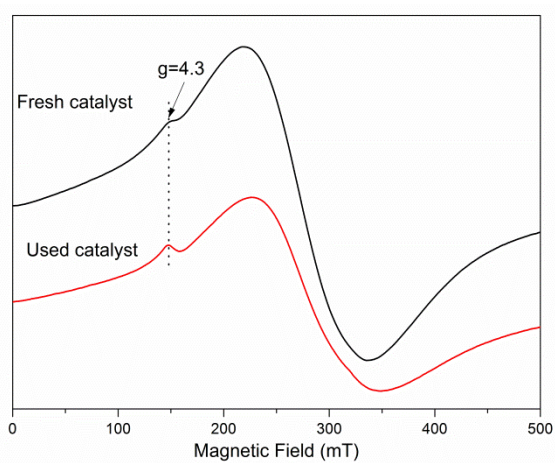

Fig.S7 EPR patterns of fresh and used  $\text{Mg}_2\text{Al}_{0.6}\text{Fe}_{0.4}\text{O}$  catalyst

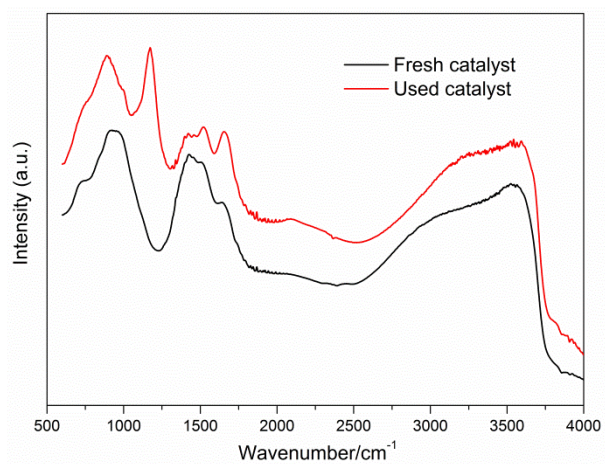

Fig. S8 FTIR patterns of  $\text{Mg}_2\text{Al}_{0.6}\text{Fe}_{0.4}\text{O}$  catalysts

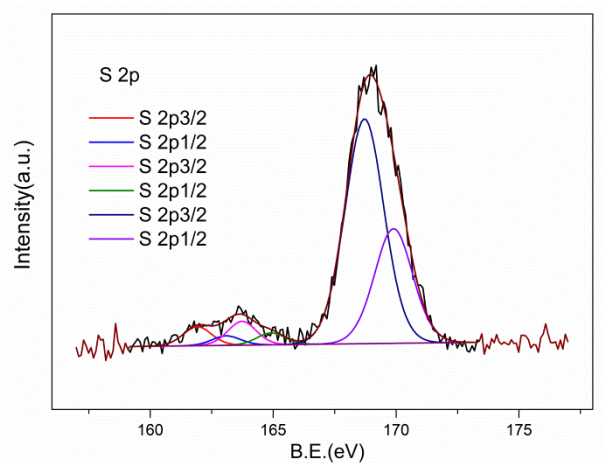

Fig. S9 S 2p XPS spectrum of  $\text{Mg}_2\text{Al}_{0.6}\text{Fe}_{0.4}\text{O}$  catalysts
